# Supplementary material for: Inactivation of the tight junction gene CLDN11 by aberrant hypermethylation modulates tubulins polymerization and promotes cell migration in nasopharyngeal carcinoma
Source: PubMed Central journal article supplement (PMC5946489; doi:10.1186/s13046-018-0754-y), 2018-05-10
Supplement: 13046_2018_754_MOESM2_ESM.pdf [file 13046_2018_754_MOESM2_ESM.pdf]

**Table S1. Sequence of primers in this study**

| Primer                               | Sequence (Forward and Reverse)                                                                             |
|--------------------------------------|------------------------------------------------------------------------------------------------------------|
| Bisulfite sequencing-CLDN11          | F TGGGGTTATTTGTTTTTTTT<br>R AAAAACTTACAATAATAACAACCCC                                                      |
| QRT-PCR-CLDN11                       | F TGGTGTTTTGCTCATTCTGC<br>R CATA CAGGGAGTAGCCAAAG                                                          |
| cDNA-CLDN11                          | F GGATCCATGGTGGCCACGTGCCTGCAG<br>R <u>AAGCTT</u> TACGTGGGCACTCTTCGCATGAGTC                                 |
| CLDN11 Promoter deletion constructs: |                                                                                                            |
| (-900)                               | F <u>TAGATCT</u> GCACGATCTTGGCGCACTGCAA                                                                    |
| (-477)                               | F <u>CAGATCT</u> TAACTGTGTGTACTGAA                                                                         |
| (-213)                               | F <u>TAGATCT</u> GGACCTGGATGGAATTG                                                                         |
| (-10)                                | F <u>GAGATCT</u> CGCGCTGCCAGCAGCG                                                                          |
| (+197)                               | R <u>AAGCTT</u> CCGCCAGGATGTCCCCGTGC                                                                       |
| 5'-Biotinylated Oligonucleotides:    |                                                                                                            |
| GATA1/2 WT                           | F CTGCCGCCGATTGGTGCTCGC<br>R GCGAGCACCAATCGGCGGCAG                                                         |
| ME                                   | F CTGC <sup>m</sup> CGC <sup>m</sup> CGATTGGTGCTCGC<br>R GCGAGCACCAAT <sup>m</sup> CGG <sup>m</sup> CGGCAG |
| MT                                   | F CTGCCGAAGCTTGGTGCTCGC<br>R GCGAGCACCAAGCTTCGGCAG                                                         |
