# Supplementary material for: Inactivation of the tight junction gene CLDN11 by aberrant hypermethylation modulates tubulins polymerization and promotes cell migration in nasopharyngeal carcinoma
Source: PubMed Central journal article supplement (PMC5946489; doi:10.1186/s13046-018-0754-y), 2018-05-10

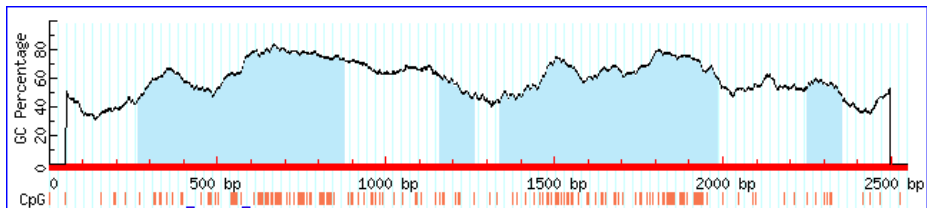

-723 +1 +1822

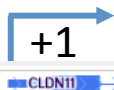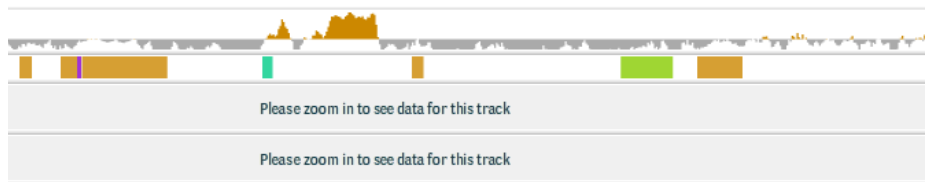

C666.1

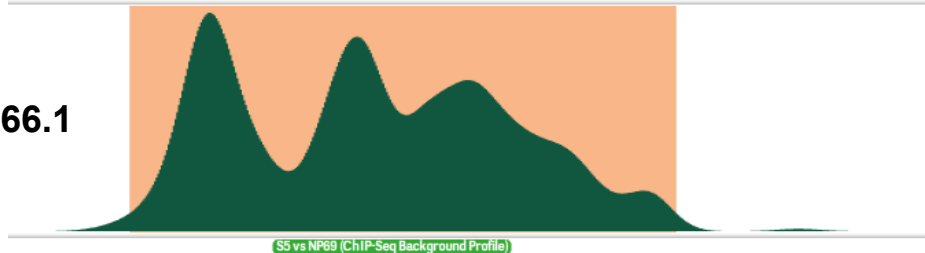

NP69

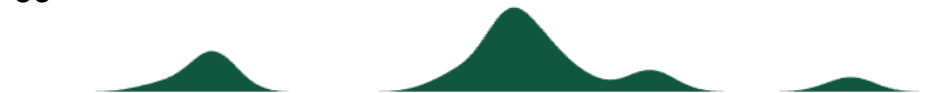

Supplement: 13046_2018_754_MOESM3_ESM.pdf [file 13046_2018_754_MOESM3_ESM.pdf]
