# Supplementary material for: Inactivation of the tight junction gene CLDN11 by aberrant hypermethylation modulates tubulins polymerization and promotes cell migration in nasopharyngeal carcinoma
Source: PubMed Central journal article supplement (PMC5946489; doi:10.1186/s13046-018-0754-y), 2018-05-10

**A****TW02 (IP)****Vec****CLDN11-3F**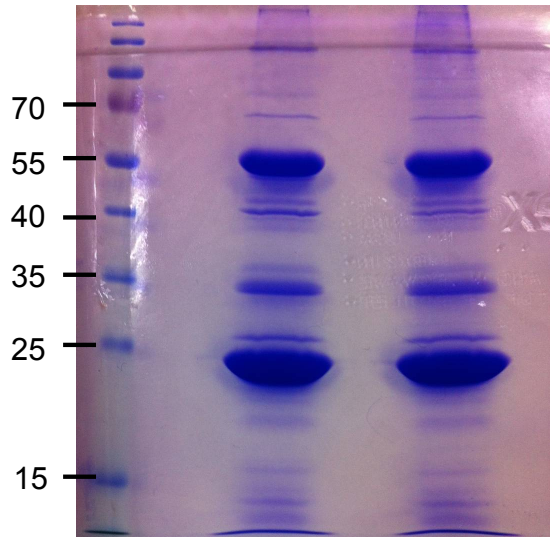**B**

| 1%    |   | 25% |   | 1% |   |
|-------|---|-----|---|----|---|
| Input |   | IP  |   | FT |   |
| V     | C | V   | C | V  | C |

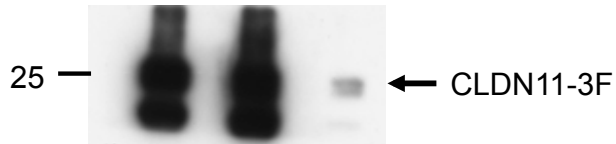

Supplement: 13046_2018_754_MOESM6_ESM.pdf [file 13046_2018_754_MOESM6_ESM.pdf]
