# Supplementary material for: Inactivation of the tight junction gene CLDN11 by aberrant hypermethylation modulates tubulins polymerization and promotes cell migration in nasopharyngeal carcinoma
Source: Springer Nature journal article supplement (doi:10.1186/s13046-018-0754-y), 2018-05-10

**CLDN11 promoter sequence (-1000~+200)**

tgtgctgtttctctatggctagtgcggtgtaatttgttggttgttgttgtg  
tttgcttttgagacgttgtctcactcagttgcccaggctggagtgacgtg  
gcacgatcttggcgcaactgcaacctccttcaagttattctcctgcctcag  
cctcccaagcagctggggttacaggcatgcgccaccatgccgggtcatt  
tttgattttctgtagagatggagtttcacatggttggtcaggctggtct  
cgaactcctgaccttaggtgatccgccaccttgacctcccaaagtctg  
ggattacaggtgtgagccaccactcccggcctagtatgtgtcattgacaa  
ttgttcctacctcaaaggctgttatgaggattaaatgagctaataatgcatgt  
aaaatgcatctgcataatatataaacacagctcgataaatgtgagttgcta  
ttggtgattattatggccacgtttgccgctgatgatgttcaaccactgaa  
aagcatcgtttcttctctctagtaactgtgtgtactgaatgcctcgcgt  
ttgtccctactgcacttttcagtctgtcacaatcctgggtcgtcggggga  
ctgtaccgagcgccttggagtgctcgcagcaggggaagaaggagcagca  
gggaggagctgaggagggctcggagcgggaatggacaccagagactgagat  
gagagaggggctataagaagagaaaaccagtcgcaggaaaacagaactctc  
gacaaacgcacgcctccttgcgctctccgtttctctggacctggatgga  
attgttttactttgcatcgcggactgcgctcgcggacgggggtggggcggc  
ccaatggccccctgggggtactctgctcccccttcacgcttccctccggg  
ccccgccccg **GATA1** cgattggc cggcgcgccccggggctgcc **GATA1/2** gccgattggtg

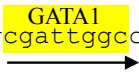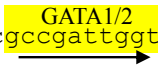

TATA

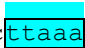

+1

**A**GCAGCGCTGCTGTCCCCGCCGTGCGCCCTTCGCCGCTGAGCTCGCAGCC  
TCCGGCGCCCACCTCCACCTCCAGTGTCCCGCCTCGGGCCGTCGCCCTCC  
AGCGGCTCGCAGCGTGGGAGACGTACCTGGGCAGGCACTGTCCAGCCCA  
GGCCCAGGCACAGCCGTGAGGGGCGAGGCACGGGGAC **GATA2** ATCCTGGCGGCCA

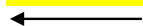

Supplement: MOESM5 [file 15754952]
