# Supplementary material for: Inactivation of the tight junction gene CLDN11 by aberrant hypermethylation modulates tubulins polymerization and promotes cell migration in nasopharyngeal carcinoma
Source: Springer Nature journal article supplement (doi:10.1186/s13046-018-0754-y), 2018-05-10
Supplement: MOESM7 [file 15754952]

**Table S2. Identified protein with fold-change >30 and p-value < 0.01**

| Accession No. | Gene Symbol | MW      | Identified peptides | Sequence coverage (%) | total spectra fold-change (C/V) | p-value |
|---------------|-------------|---------|---------------------|-----------------------|---------------------------------|---------|
| TBA1B_HUMAN   | TUBA1B      | 50 kDa  | 25                  | 69.2                  | 800.06                          | <0.001  |
| CLD11_HUMAN   | CLDN11      | 22 kDa  | 4                   | 15.9                  | 193.99                          | 0.005   |
| MBB1A_HUMAN   | MYBBP1A     | 149 kDa | 35                  | 31                    | 191.82                          | 0.002   |
| ESYT2_HUMAN   | ESYT2       | 102 kDa | 15                  | 22.3                  | 77.92                           | 0.001   |
| TRRAP_HUMAN   | TRRAP       | 438 kDa | 32                  | 10.3                  | 70.51                           | 0.004   |
| NU188_HUMAN   | NUP188      | 196 kDa | 18                  | 13.3                  | 67.20                           | 0.001   |
| PDS5B_HUMAN   | PDS5B       | 165 kDa | 20                  | 18.3                  | 47.33                           | 0.004   |
| ITM2B_HUMAN   | ITM2B       | 30 kDa  | 10                  | 51.9                  | 46.42                           | 0.005   |
| MRP1_HUMAN    | ABCC1       | 172 kDa | 15                  | 13.5                  | 43.45                           | 0.008   |
| TBB3_HUMAN    | TUBB3       | 50 kDa  | 6                   | 49.8                  | 36.96                           | 0.005   |
| LY6K_HUMAN    | LY6K        | 19 kDa  | 4                   | 31.5                  | 32.61                           | 0.002   |
| AT2B1_HUMAN   | ATP2B1      | 139 kDa | 13                  | 13.8                  | 32.50                           | 0.003   |
| S38A2_HUMAN   | SLC38A2     | 56 kDa  | 5                   | 17.6                  | 31.98                           | 0.003   |
| MON2_HUMAN    | MON2        | 190 kDa | 11                  | 7.1                   | 31.95                           | 0.009   |
| DECR2_HUMAN   | DECR2       | 31 kDa  | 10                  | 33.9                  | 31.86                           | 0.007   |
| TAP2_HUMAN    | TAP2        | 76 kDa  | 9                   | 15.5                  | 30.85                           | 0.008   |
| GAPD1_HUMAN   | GAPVD1      | 165 kDa | 10                  | 9.4                   | 30.48                           | <0.001  |
| RM13_HUMAN    | MRPL13      | 21 kDa  | 6                   | 39.3                  | 30.12                           | 0.010   |

MW, molecular weight
