# Supplementary material for: Inactivation of the tight junction gene CLDN11 by aberrant hypermethylation modulates tubulins polymerization and promotes cell migration in nasopharyngeal carcinoma
Source: Springer Nature journal article supplement (doi:10.1186/s13046-018-0754-y), 2018-05-10

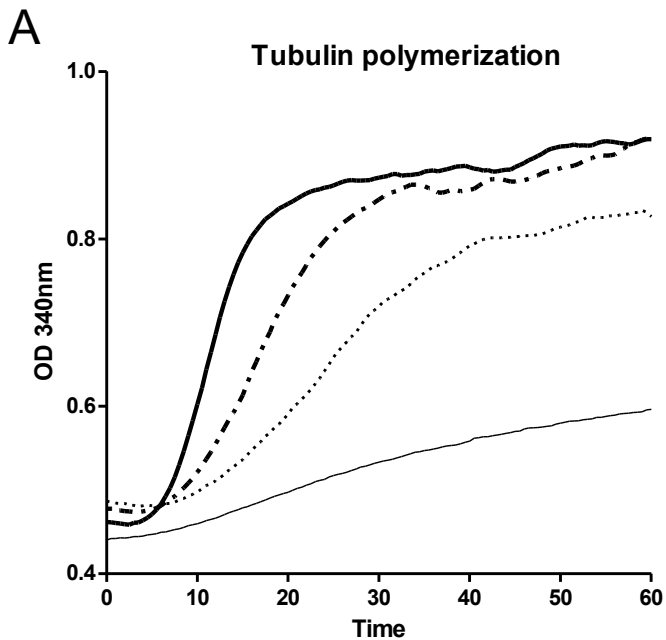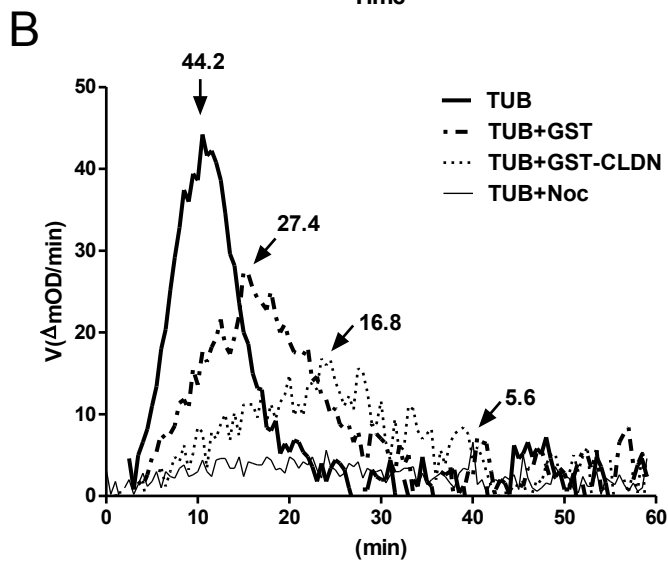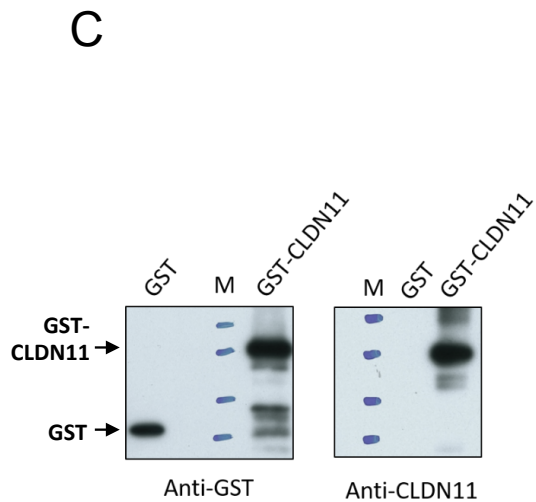

Supplement: MOESM9 [file 15754952]
